# Supplementary material for: Ablation of PGC-1β Results in Defective Mitochondrial Activity, Thermogenesis, Hepatic Function, and Cardiac Performance
Source: PLOS journal article supplement (doi:10.1371/journal.pbio.0040369), 2006-11-03
Supplement: S1 (10.1371/journal.pbio.0040369.s001) [file journal.pbio.0040369.s001]

**Supplementary Table 1: WT and PGC1KO mouse parameters for energy intake and faecal output over 48h**

|  | **Wild-type** | **PGC1KO** | ***P*-value** |
| --- | --- | --- | --- |
| **Food Intake (g/48h)** | **8.48  0.27** | **8.34  0.27** | **NS** |
| **Body Weight (g)** | **29.99  0.82** | **29.13  0.71** | **NS** |
| **Food Intake/Body Weight (g)** | **0.29  0.02** | **0.29  0.01** | **NS** |
| **Energy In (Cal/48h)** | **156731  4939** | **154097  4976** | **NS** |
| **Faecal Energy Out (Cal/48h)** | **34459  1412** | **34278  1111** | **NS** |
| **Ratio (EI:EO)** | **29.99  0.82** | **29.13  0.71** | **NS** |

The food intake and energetic content of faeces from 12 week-old male mice was determined over a 48h period. *n*=5-8/group.
